# Supplementary material for: Estimated indirect costs of haemodialysis versus peritoneal dialysis from a patients’ perspective at an Academic Hospital in Pretoria, South Africa
Source: Springer Nature journal article supplement (doi:10.1186/s12913-023-10109-2), 2023-10-18
Supplement: MOESM1 [file 26202152]

**Please use this tool to interview the participants and indicate with an (X) on the appropriate options or fill in the blank spaces accordingly.**

**Demographics:**

|                                       |               |                     |
|---------------------------------------|---------------|---------------------|
| 1. Gender of participant:             | Male          | Female              |
| 2. ID number:                         |               |                     |
| 3. Date of birth:                     |               |                     |
| 4. Type of renal replacement therapy: | Haemodialysis | Peritoneal dialysis |
| 5. Marital status of participant:     |               |                     |
| 6. Education level of participant:    |               |                     |
| 7. Comorbidities:                     |               |                     |
| 8. Causes of End Stage Renal Disease: |               |                     |

**Questions to ask the patient:**

|                                                                     |  |
|---------------------------------------------------------------------|--|
| 1. What is your employment status?                                  |  |
| 2. If unemployed, what is the reason for your unemployment?         |  |
| 3. If employed, what is your sector of employment?                  |  |
| 4. How much time (hours) do you spend travelling to the hospital?   |  |
| 5. How much time do you spend waiting for services at the hospital? |  |

|                                                                                                                                                           |     |    |
|-----------------------------------------------------------------------------------------------------------------------------------------------------------|-----|----|
| 6. How much time (in hours) do you spend for dialysis at the hospital (For Hemodialysis)?                                                                 |     |    |
| 7. How much time (hours) do you spend to pick up medicines?                                                                                               |     |    |
| 8. How much time do you spend (hours) changing the dialysate at home (for peritoneal dialysis)                                                            |     |    |
| 9. Do you ever come to the hospital for other complications related to renal failure besides being admitted? If yes how many hours do you spend?          |     |    |
| 10. How much time do you spend (in hours) in the hospital when admitted (the last 3 months)?                                                              |     |    |
| 11. Do you have a caregiver?                                                                                                                              | Yes | No |
| 12. If yes; is your caregiver employed?                                                                                                                   | Yes | No |
| 13. If your caregiver is unemployed, what is the reason they are unemployed?                                                                              |     |    |
| 14. If caregiver is employed, do they have to take time off work to take care of you?                                                                     | Yes | No |
| 15. If employed how many hours does your care giver spend off duty assisting you with dialysis at home or helping you to do the dialysis at the hospital? |     |    |
| 16. If your caregiver is employed, what is their your sector of employment?                                                                               |     |    |
